# Supplementary material for: Dosage of Dual-Protein Nutrition Differentially Impacts the Formation of Atherosclerosis in ApoE−/− Mice
Source: MDPI journal article supplement (doi:10.3390/nu14040855), 2022-02-18
Supplement: s1 [file s1]

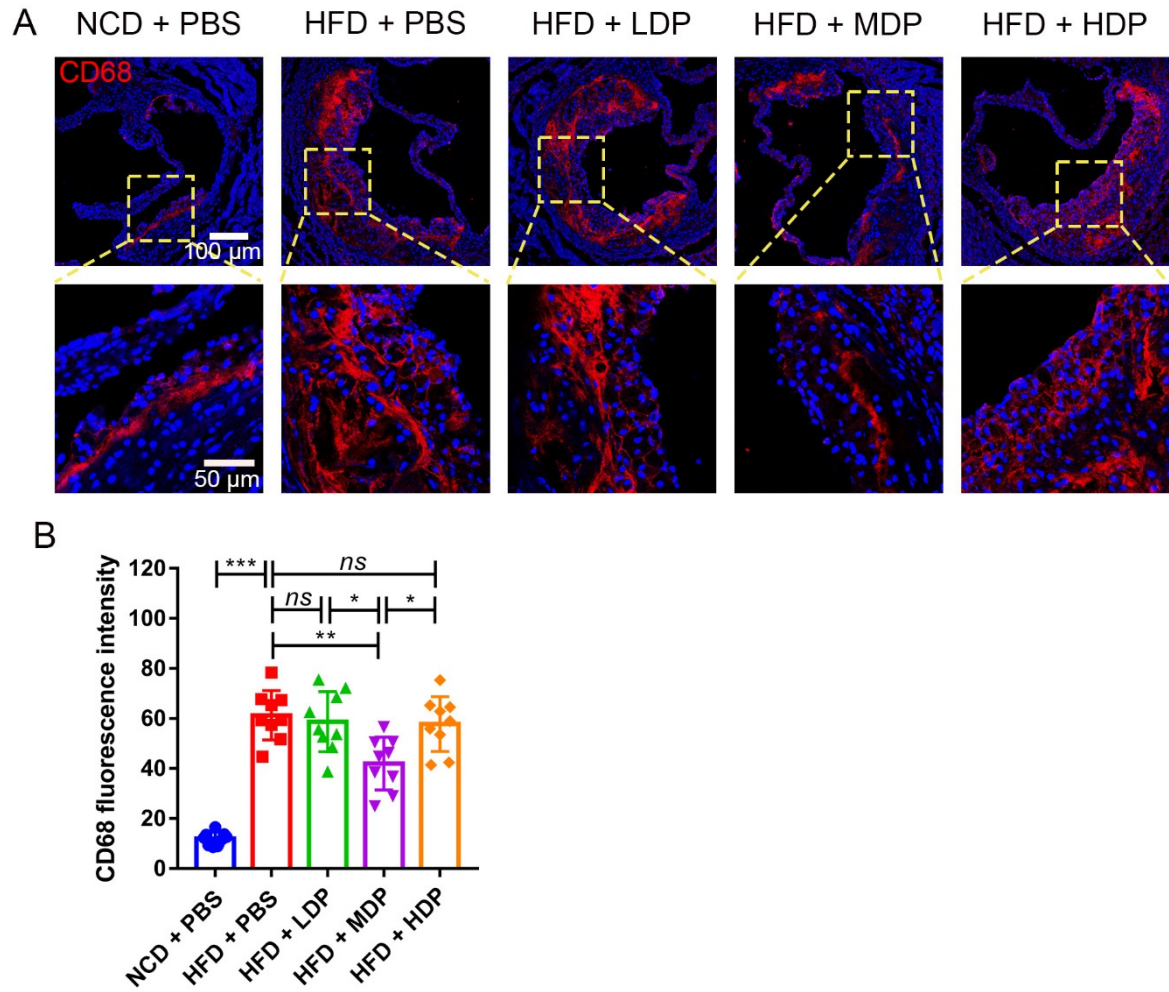

**Figure S1.** Local inflammation was reduced in *ApoE*<sup>-/-</sup> mice after oral gavage with middle-dose dual-protein (MDP). *ApoE*<sup>-/-</sup> mice were grouped and treated as in Figure 1. (A) Representative immunofluorescence staining for macrophage-specific antigen CD68 (red) in atherosclerotic lesions; (B) The fluorescence intensity of CD68 was quantified by Image J software. Data were presented as mean ± SD. *n* = 6 to 9, \**P* < 0.05, \*\**P* < 0.01, \*\*\**P* < 0.001, *ns* indicates no significance. Phosphate-buffered saline (PBS), normal-chow-diet (NCD), high-fat-diet (HFD), low-dose dual-protein (LDP), high-dose dual-protein (HDP).
